# Supplementary material for: Nitrogen-doped carbon dots/Fe3+-based fluorescent probe for the “off–on” sensing of As(v) in seafood
Source: Royal Society of Chemistry journal article supplement (doi:10.1039/d2ay02098j), 2023-01-01
Supplement: d2ay02098j1.pdf [file d2ay02098j1.pdf]

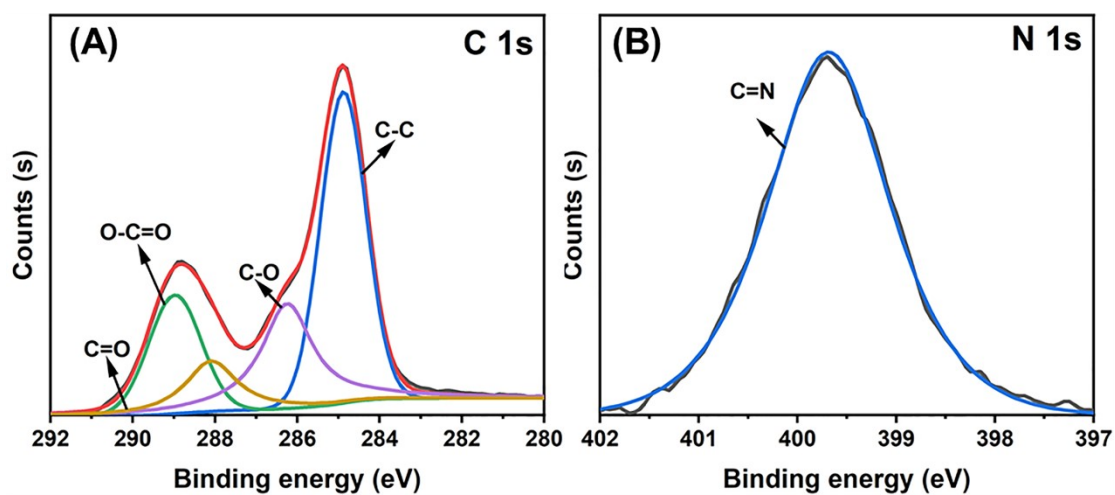

1

2 **Figure S1.** High-resolution XPS spectra for (A) C 1s and (B) N 1s in N-CDs.

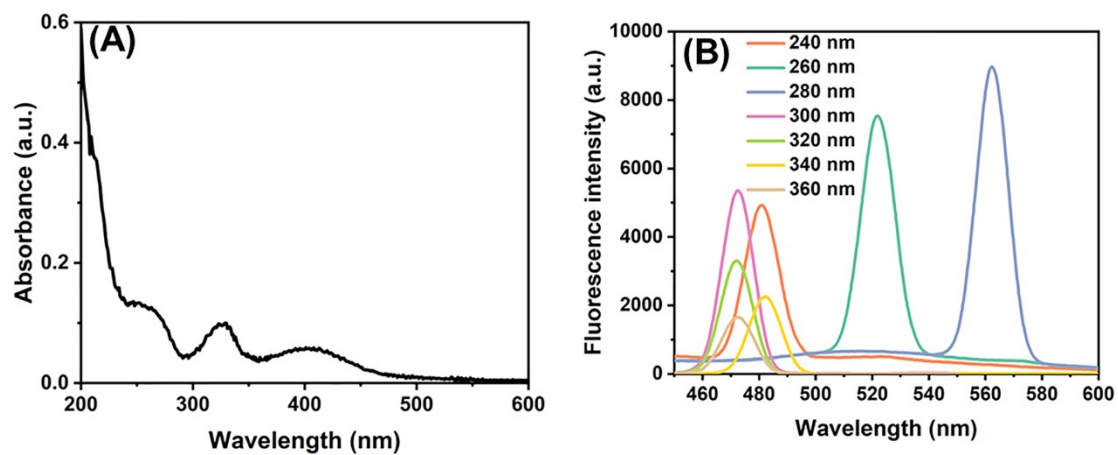

3

4 **Figure S2.** (A) UV-Vis absorption spectrum of N-CDs and (B) its emission spectra at

5 different excitation wavelengths.

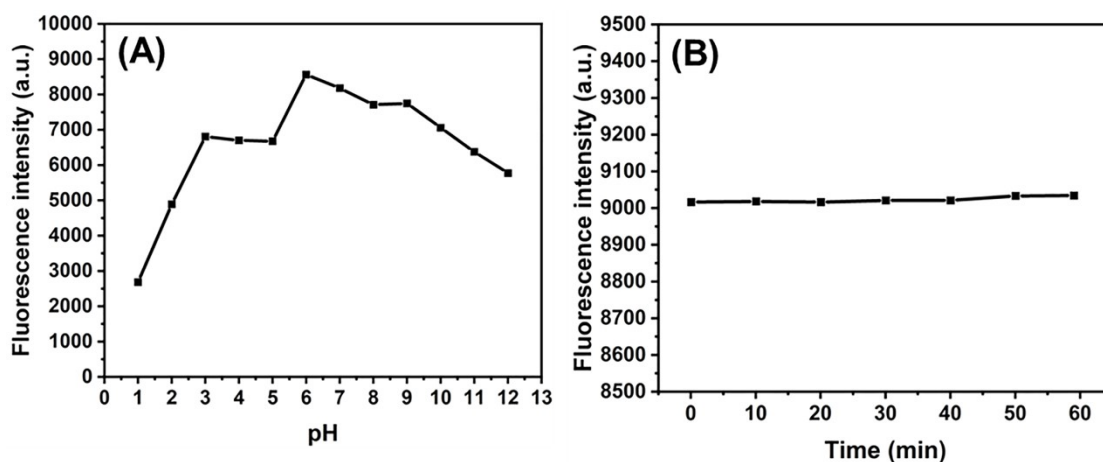

6  
7 **Figure S3.** Photostability of N-CDs. (A) Fluorescence stability of N-CDs in different  
8 pH solutions; (B) Fluorescent time scan of N-CDs for 60 min under 260 nm excitation.  
9

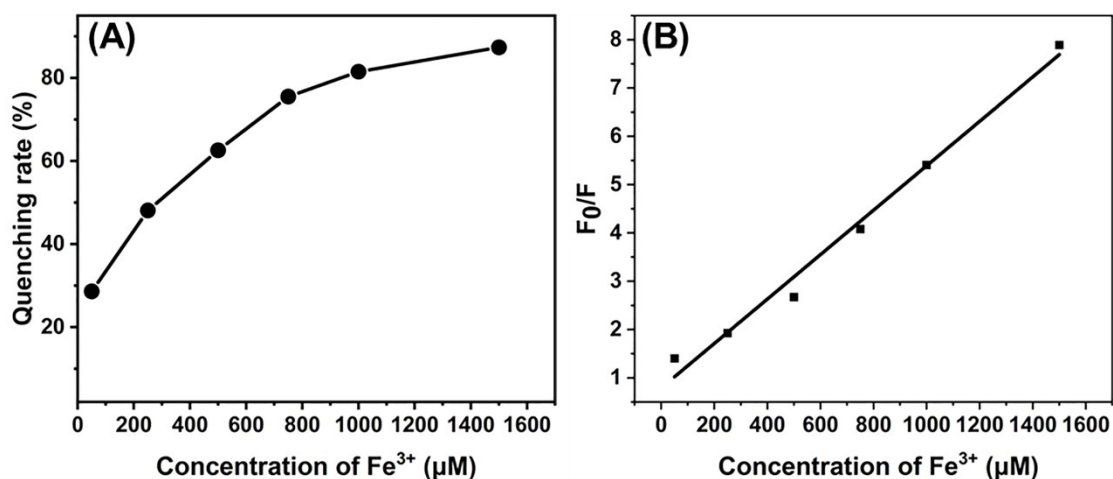

10  
11 **Figure S4.** (A) Optimization of the concentration of  $\text{Fe}^{3+}$  ions for fluorescence  
12 quenching; (B) Stern-Volmer plot between  $F_0/F$  and  $[Q]$  at 298 K.

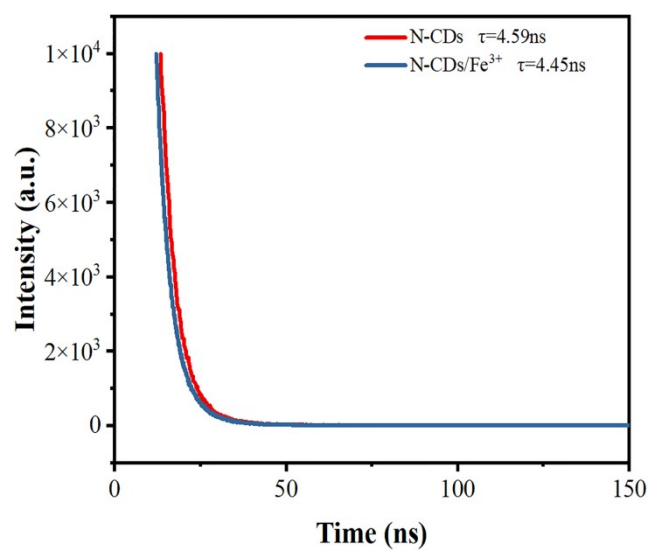

13

14

**Figure S5.** Fluorescence lifetime decay of N-CDs and N-CDs/ $\text{Fe}^{3+}$  complexes.
